# Supplementary material
Source: Royal Society of Chemistry journal article supplement (doi:10.1039/d6cp01242f)
Supplement: d6cp01242f1.pdf [file d6cp01242f1.pdf]

## Supporting Information

# Lead-Free $\text{Cs}_3\text{MnCl}_5$ and $\text{CsMnCl}_3$ Crystals: Rapid on-chip Crystallization, Phase Transition and Fluorescence Sensing Applications

*Zihan Ren,<sup>†</sup> Feng Zhang,<sup>\*,†</sup> Yuxiang Zhang,<sup>†</sup> Zilong Lu,<sup>†</sup> Tianrui Zhai<sup>\*,†</sup>*

<sup>†</sup> School of Physics and Optoelectronic Engineering, Beijing University of Technology,  
Beijing, 100124, China.

\* Email: [fengzhang@bjut.edu.cn](mailto:fengzhang@bjut.edu.cn); [trzhai@bjut.edu.cn](mailto:trzhai@bjut.edu.cn)

KEYWORDS: Mn perovskites; Crystals; Phase transition; Coordination; Fluorescence

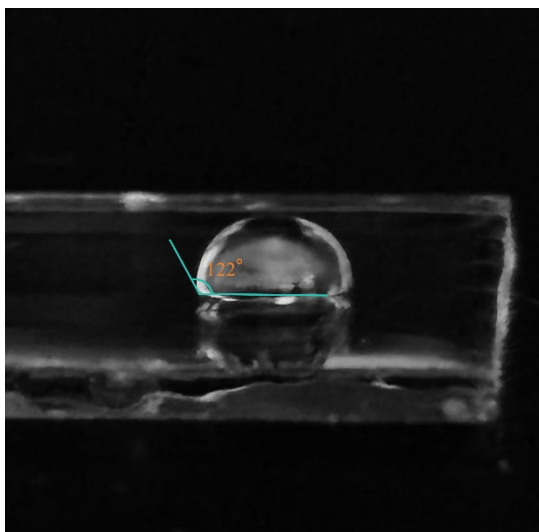

**Figure S1.** A droplet formed on PDMS coated substrate and the corresponding contact angle.

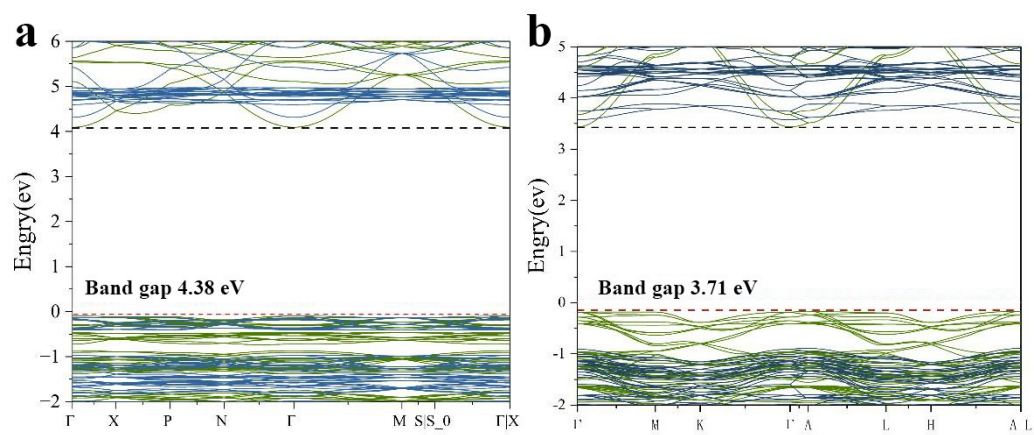

**Figure S2.** DFT calculations for  $\text{Cs}_3\text{MnCl}_5$  and  $\text{CsMnCl}_3$  crystals. (a)  $\text{Cs}_3\text{MnCl}_5$ . (b)  $\text{CsMnCl}_3$ .

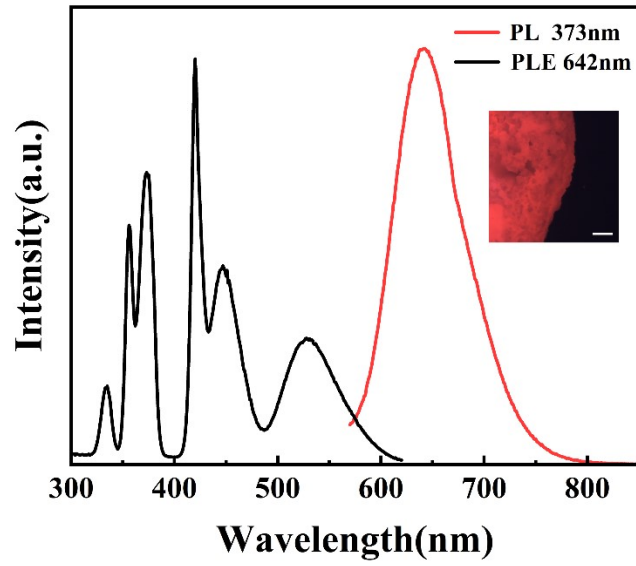

**Figure S3.** PL and PLE spectra of  $\text{CsMnCl}_3$  formed after phase transition of  $\text{Cs}_3\text{MnCl}_5$ . The inset shows fluorescence microscopy images of the crystal under 365 nm excitation. The scale bar is 50  $\mu\text{m}$ .

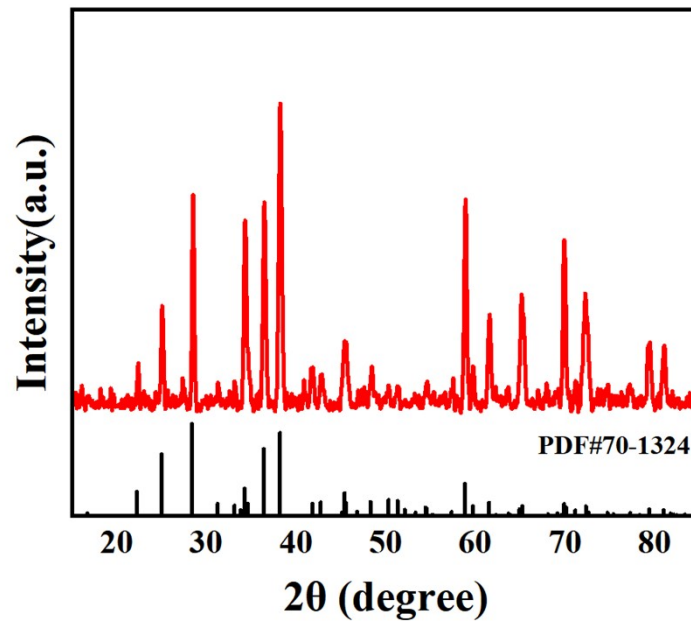

**Figure S4.** XRD pattern of  $\text{CsMnCl}_3$  formed after phase transition of  $\text{Cs}_3\text{MnCl}_5$ .

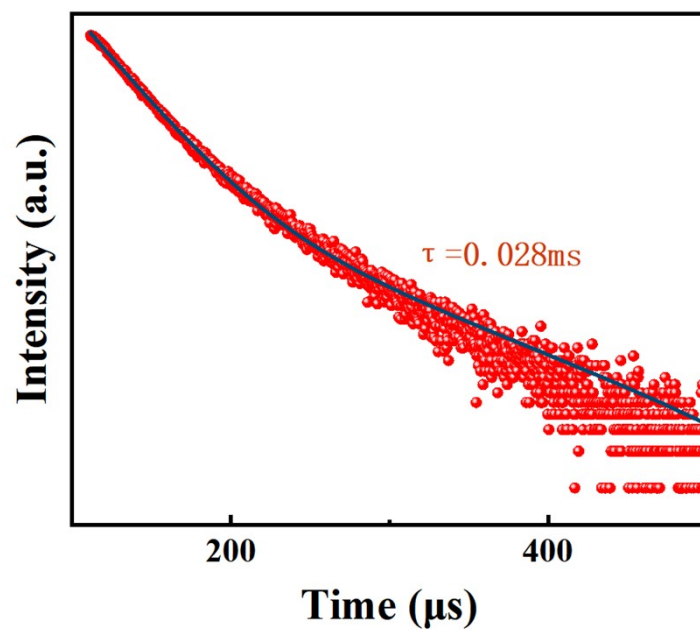

Figure S5. Time-resolved PL spectrum of  $\text{CsMnCl}_3$  formed after phase transition of  $\text{Cs}_3\text{MnCl}_5$ .

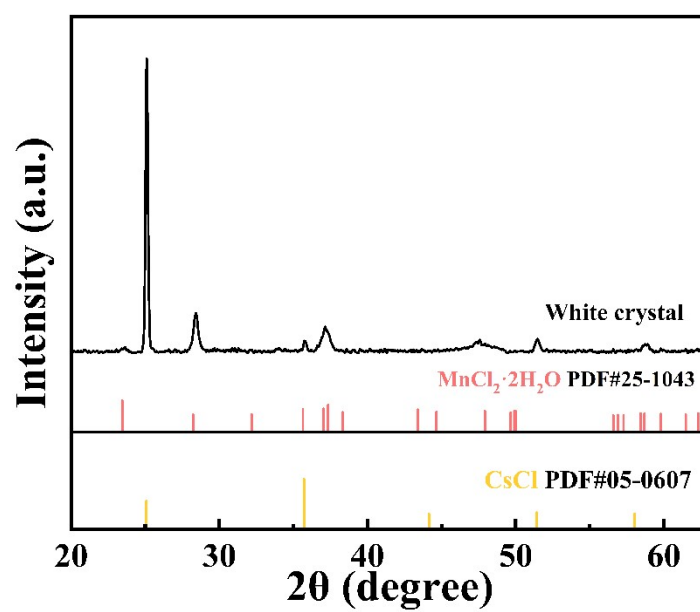

Figure S6. XRD pattern of the non-luminescent white crystal.

**Table S1.** Comparison of on-chip rapid crystallization and other growth strategies for Mn-based halide perovskites.

| Synthetic strategy                           | Materials                                                                                                  | Crystal size/structure                       | Advantages                          |
|----------------------------------------------|------------------------------------------------------------------------------------------------------------|----------------------------------------------|-------------------------------------|
| Hot-injection <sup>1</sup>                   | CsPb <sub>1-x</sub> Mn <sub>x</sub> Cl <sub>3</sub><br>CsPb <sub>1-x</sub> Mn <sub>x</sub> Br <sub>3</sub> | Monodisperse Mn-doped colloidal nanocrystals | High crystallinity and strong PL    |
| Ligand-assisted reprecipitation <sup>2</sup> | MAPb <sub>1-x</sub> Mn <sub>x</sub> Cl <sub>3</sub><br>MAPb <sub>1-x</sub> Mn <sub>x</sub> Br <sub>3</sub> | Quantum dots or nanocrystals                 | Simple and low-cost                 |
| Ion exchange <sup>3</sup>                    | CsMn(Cl/Br) <sub>3</sub>                                                                                   | Mn based mixed-halide nanocrystals           | Tunable emissions                   |
| Mechanical solid-state grinding <sup>4</sup> | CsPbCl <sub>3</sub> :Mn<br>CsPb(Cl/Br) <sub>3</sub> :Mn                                                    | Mn doped microcrystals                       | Green and low-cost                  |
| <b>On-chip rapid crystallization</b>         | <b>Cs<sub>3</sub>MnCl<sub>5</sub></b><br><b>CsMnCl<sub>3</sub></b>                                         | <b>Micrometer sized single crystals</b>      | <b>Simple, rapid, and versatile</b> |

#### References

1. W. Liu, Q. Lin, H. Li, K. Wu, I. Robel, J. M. Pietryga and V. I. Klimov, *Journal of the American Chemical Society*, 2016, 138, 14954-14961.
2. F. Treber, K. Frank, B. Nickel, C. Lampe and A. S. Urban, *Small*, 2023, 19, 2300525.
3. W. van der Stam, J. J. Geuchies, T. Altantzis, K. H. W. van den Bos, J. D. Meeldijk, S. Van Aert, S. Bals, D. Vanmaekelbergh and C. de Mello Donega, *Journal of the American Chemical Society*, 2017, 139, 4087-4097.
4. L. Protesescu, S. Yakunin, O. Nazarenko, D. N. Dirin and M. V. Kovalenko, *ACS Applied Nano Materials*, 2018, 1, 1300-1308.
